# Supplementary material
Source: MDPI journal article supplement (https://www.mdpi.com/2305-6320/10/1/8)
Supplement: s1 [file s1]

**Supplementary Tables of individual subject changes after treatment measuring IL-6,  
Absolute lymphocyte count, CD4, and CD8**

**Table S1: IL- 6 (0.00-7.00 pg/mL) Individual subject changes after treatment in comparison  
with baseline, (RM-ANOVA test)**

| <b>Subject</b>                                      | <b>Baseline</b> | <b>Day 17</b> | <b>Day 34</b> | <b>Day 60</b> |
|-----------------------------------------------------|-----------------|---------------|---------------|---------------|
| 1                                                   | 1.50            | 3.67          | 10.4          | 3.34          |
| 2                                                   | 3.02            | 5.49          | 9.22          | 7.58          |
| 3                                                   | 2.00            | 6.42          | 44.6          | 5.93          |
| 4                                                   | 1.5             | 2.65          | 24.5          | 1.5           |
| 5                                                   | 2.5             | 8.23          | 41.8          | 1.59          |
| 6                                                   | 3.7             | 8.77          | 38.1          | 1.5           |
| 7                                                   | 1.5             | 3.91          | 23.4          | 4.14          |
| 8                                                   | 1.5             | 12.0          | 39.5          | 24.26         |
| 9                                                   | 1.5             | 4.9           | 35.7          | 4.5           |
| 10                                                  | 1.5             | 4.73          | 23.1          | 3.95          |
| Mean                                                | 2.022           | 6.077         | 29.032        | 5.829         |
| Note: p-value 0, calculated using the RM-ANOVA test |                 |               |               |               |

**Table S2: Individual subject CD panel in individuals during the study****(t-Test, Paired two Sample for Means)**

| Subject | Absolute Lymphocyte<br>count (990.00 -<br>3150.00)/ul |        | Absolute CD4<br>(424.00-1509.00)/ul |        | Absolute CD8<br>(169.00-955.00)/ul |        |
|---------|-------------------------------------------------------|--------|-------------------------------------|--------|------------------------------------|--------|
|         | Day 34                                                | Day 60 | Day 34                              | Day 60 | Day 34                             | Day 60 |
| 1.      | 2605                                                  | 2428   | 630                                 | 567    | 1046                               | 1153   |
| 2.      | 1563                                                  | 1699   | 505                                 | 526    | 563                                | 699    |
| 3.      | 2700                                                  | 2666   | 1453                                | 1520   | 427                                | 359    |
| 4.      | 2281                                                  | 2690   | 1037                                | 1244   | 487                                | 538    |
| 5.      | 1570                                                  | 1809   | 722                                 | 826    | 300                                | 351    |
| 6.      | 1754                                                  | 1733   | 801                                 | 846    | 426                                | 444    |
| 7.      | 1576                                                  | 1875   | 628                                 | 693    | 527                                | 585    |
| 8.      | 2854                                                  | 3004   | 1010                                | 1179   | 803                                | 848    |
| 9.      | 2445                                                  | 2097   | 633                                 | 614    | 908                                | 751    |
| 10.     | 2639                                                  | 2878   | 916                                 | 993    | 1036                               | 1149   |
| Mean    | 2198.7                                                | 2287.9 | 833.5                               | 900.8  | 652.3                              | 687.7  |
| P value | 0.25587                                               |        | 0.026799                            |        | 0.2373                             |        |
